# Supplementary material
Source: Springer Nature journal article supplement (https://www.springermedizin.de/resource/supplementary/13023_2009_324_MOESM10_ESM.pdf/9642112)
Supplement: MOESM10 [file 9642112]

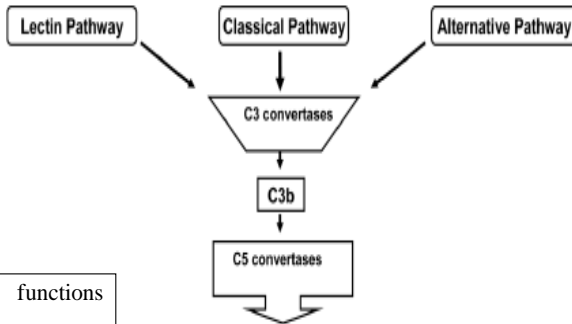

Complement proximal functions are preserved :

- opsonization of micro-organisms
- clearance of immune complexes

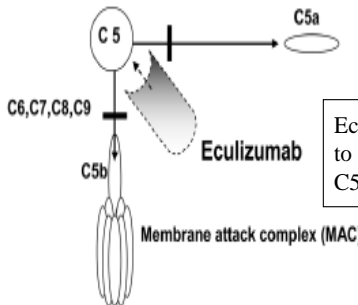

Eculizumab binds specifically to C5 and blocks its cleavage to C5a and C5b

Terminal complement activation is inhibited  
 → increased susceptibility to meningococcal infections
